# Supplementary material
Source: ML conference proceedings conference paper supplement (https://openaccess.thecvf.com/content/CVPRW_2020/html/van_Rozendaal_Lossy_Compression_With_CVPRW_2020_paper.html)
Supplement: Supplementary file 1 [file van_Rozendaal_Lossy_Compression_With_CVPRW_2020_supplemental.pdf]

## A. Supplementary Material

### A.1. PSNR Results

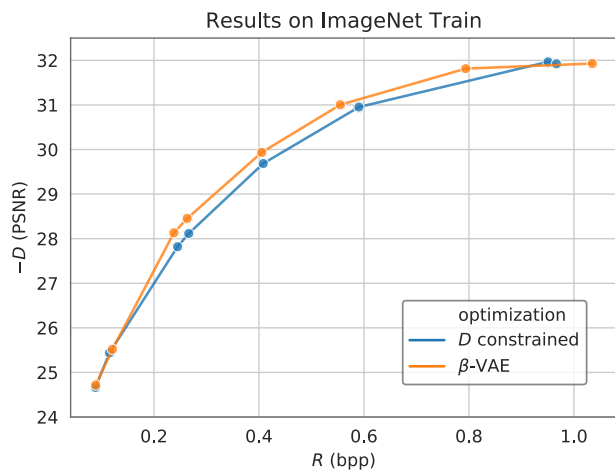

Figure A.1: Rate / PSNR performance for  $D$  constrained optimization and  $\beta$ -VAE.

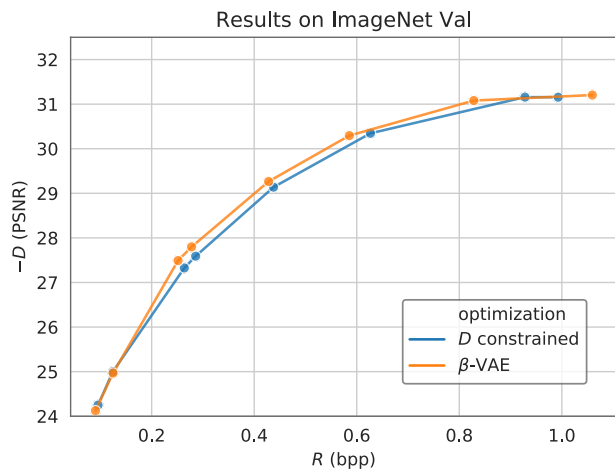

Figure A.2: Rate / PSNR performance for  $D$  constrained optimization and  $\beta$ -VAE.
